# Supplementary material for: Predictive analytics for crystalline materials: bulk modulus
Source: Royal Society of Chemistry journal article supplement (doi:10.1039/c6ra19284j), 2016-01-01
Supplement: c6ra19284j1.pdf [file c6ra19284j1.pdf]

## Supplementary Information for Predictive analytics for crystalline materials: Bulk modulus

Al'ona Furmanchuk<sup>a‡</sup>, Ankit Agrawal<sup>a\*</sup>, Alok Choudhary<sup>a</sup>

<sup>a</sup>Department of Electrical Engineering and Computer Science, Northwestern University, USA

Corresponding author: Ankit Agrawal  
E-mail: ankitag@eecs.northwestern.edu

<sup>‡</sup>Current affiliation: Center for Health Information Partnerships, Northwestern University, Feinberg School of Medicine, Chicago, IL 60611, USA

### Contents

|                                                                  |     |
|------------------------------------------------------------------|-----|
| <b>Part S1.</b> Data set characterization.                       | S1  |
| <b>Part S2.</b> Attribute ranking and reduction                  | S3  |
| <b>Part S3.</b> Experimental vs predicted values of Bulk modulus | S7  |
| <b>Part S4.</b> ThermoEl tool for prediction of Bulk modulus     | S16 |

### Part S1. Data set characterization.

|                    |                 |              |                  |                  |                  |                  |                  |                  |                  |                   |                   |                   |                 |                   |                  |                  |                 |                 |
|--------------------|-----------------|--------------|------------------|------------------|------------------|------------------|------------------|------------------|------------------|-------------------|-------------------|-------------------|-----------------|-------------------|------------------|------------------|-----------------|-----------------|
| 1<br><b>H</b>      |                 |              |                  |                  |                  |                  |                  |                  |                  |                   |                   |                   |                 |                   |                  |                  |                 | 2<br><b>He</b>  |
| 3<br><b>Li</b>     | 4<br><b>Be</b>  |              |                  |                  |                  |                  |                  |                  |                  |                   |                   | 5<br><b>B</b>     | 6<br><b>C</b>   | 7<br><b>N</b>     | 8<br><b>O</b>    | 9<br><b>F</b>    | 10<br><b>Ne</b> |                 |
| 11<br><b>Na</b>    | 12<br><b>Mg</b> |              |                  |                  |                  |                  |                  |                  |                  |                   |                   | 13<br><b>Al</b>   | 14<br><b>Si</b> | 15<br><b>P</b>    | 16<br><b>S</b>   | 17<br><b>Cl</b>  | 18<br><b>Ar</b> |                 |
| 19<br><b>K</b>     | 20<br><b>Ca</b> |              | 21<br><b>Sc</b>  | 22<br><b>Ti</b>  | 23<br><b>V</b>   | 24<br><b>Cr</b>  | 25<br><b>Mn</b>  | 26<br><b>Fe</b>  | 27<br><b>Co</b>  | 28<br><b>Ni</b>   | 29<br><b>Cu</b>   | 30<br><b>Zn</b>   | 31<br><b>Ga</b> | 32<br><b>Ge</b>   | 33<br><b>As</b>  | 34<br><b>Se</b>  | 35<br><b>Br</b> | 36<br><b>Kr</b> |
| 37<br><b>Rb</b>    | 38<br><b>Sr</b> |              | 39<br><b>Y</b>   | 40<br><b>Zr</b>  | 41<br><b>Nb</b>  | 42<br><b>Mo</b>  | 43<br><b>Tc</b>  | 44<br><b>Ru</b>  | 45<br><b>Rh</b>  | 46<br><b>Pd</b>   | 47<br><b>Ag</b>   | 48<br><b>Cd</b>   | 49<br><b>In</b> | 50<br><b>Sn</b>   | 51<br><b>Sb</b>  | 52<br><b>Te</b>  | 53<br><b>I</b>  | 54<br><b>Xe</b> |
| 55<br><b>Cs</b>    | 56<br><b>Ba</b> | 57-70<br>*   | 71<br><b>Lu</b>  | 72<br><b>Hf</b>  | 73<br><b>Ta</b>  | 74<br><b>W</b>   | 75<br><b>Re</b>  | 76<br><b>Os</b>  | 77<br><b>Ir</b>  | 78<br><b>Pt</b>   | 79<br><b>Au</b>   | 80<br><b>Hg</b>   | 81<br><b>Tl</b> | 82<br><b>Pb</b>   | 83<br><b>Bi</b>  | 84<br><b>Po</b>  | 85<br><b>At</b> | 86<br><b>Rn</b> |
| 87<br><b>Fr</b>    | 88<br><b>Ra</b> | 89-102<br>** | 103<br><b>Lr</b> | 104<br><b>Rf</b> | 105<br><b>Db</b> | 106<br><b>Sg</b> | 107<br><b>Bh</b> | 108<br><b>Hs</b> | 109<br><b>Mt</b> | 110<br><b>Uun</b> | 111<br><b>Uuu</b> | 112<br><b>Uub</b> |                 | 114<br><b>Uuq</b> |                  |                  |                 |                 |
| *Lanthanide series |                 |              | 57<br><b>La</b>  | 58<br><b>Ce</b>  | 59<br><b>Pr</b>  | 60<br><b>Nd</b>  | 61<br><b>Pm</b>  | 62<br><b>Sm</b>  | 63<br><b>Eu</b>  | 64<br><b>Gd</b>   | 65<br><b>Tb</b>   | 66<br><b>Dy</b>   | 67<br><b>Ho</b> | 68<br><b>Er</b>   | 69<br><b>Tm</b>  | 70<br><b>Yb</b>  |                 |                 |
| **Actinide series  |                 |              | 89<br><b>Ac</b>  | 90<br><b>Th</b>  | 91<br><b>Pa</b>  | 92<br><b>U</b>   | 93<br><b>Np</b>  | 94<br><b>Pu</b>  | 95<br><b>Am</b>  | 96<br><b>Cm</b>   | 97<br><b>Bk</b>   | 98<br><b>Cf</b>   | 99<br><b>Es</b> | 100<br><b>Fm</b>  | 101<br><b>Md</b> | 102<br><b>No</b> |                 |                 |

**Figure S1.** Elemental content of TE design database. Elements present in TE design database are marked in grey.

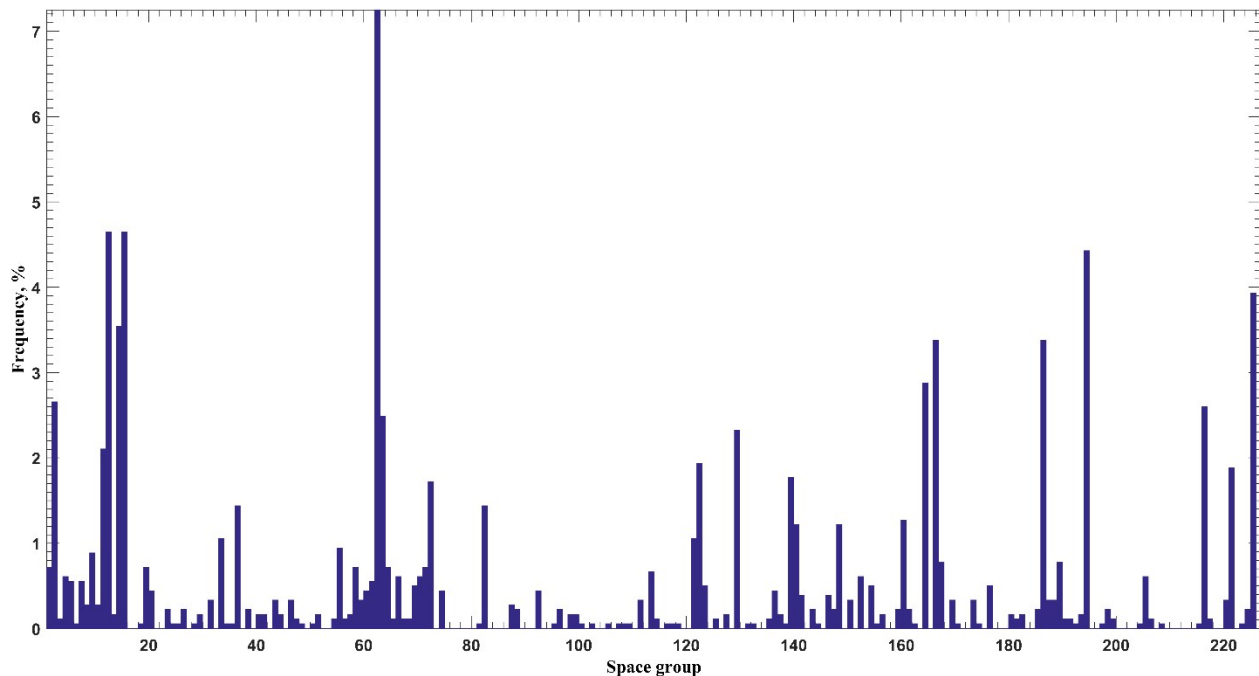

**Figure S2.** Population of TE design database by space groups.

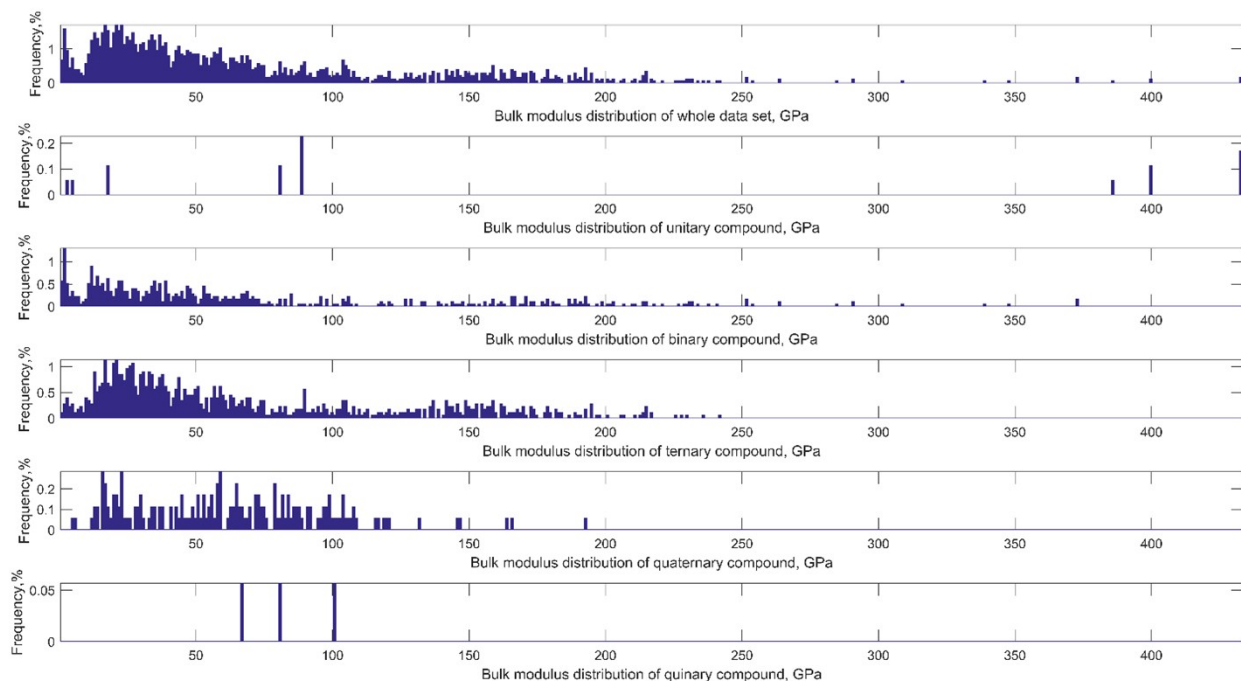

**Figure S3.** Distribution of Bulk modulus values in data set cleaned from duplicates.

The cutoff 250GPa was applied to curated data set in order to avoid undersampling problem in the model. Therefore, 21 samples (Table S1) whose Bulk modulus values were  $>250$  GPa were excluded from the data set. After this step, one sample for  $B_1N_1$ , 50 samples for  $O_2Si_1$ , six samples for  $Ni_4Si_3$ , and four samples for  $Al_1N_1$  were still present in the data set. No sample for  $C_1$ , and  $Ru_1C_1$  were left.

**Tables S1.** List of ICSD codes for samples excluded from data set due to their high values of Bulk modulus.

| <b>ICSD Numbers for samples with Bulk modulus &gt; 250 GPa</b> |            |              |              |              |             |
|----------------------------------------------------------------|------------|--------------|--------------|--------------|-------------|
| <b>C1</b>                                                      | <b>BN1</b> | <b>Ru1C1</b> | <b>O2Si1</b> | <b>N4Si3</b> | <b>AlN1</b> |
| 182761                                                         | 162876     | 183170       | 170531       | 97567        | 41358       |
| 66464                                                          | 183257     |              | 44271        | 156337       |             |
| 182760                                                         | 614864     |              | 40105        |              |             |
| 27422                                                          | 162875     |              | 181310       |              |             |
| 28859                                                          | 182731     |              | 51702        |              |             |
| 88819                                                          |            |              |              |              |             |
| 67787                                                          |            |              |              |              |             |

**Table S2.** Statistics of TE design database, and summary on splitting of cleaned data.

| <b>Compound type</b> | <b>Set after cleaning from duplicates</b> | <b>Set after cleaning from outliers and others</b> | <b>Withheld subset for further tests</b> | <b>Working set</b> |
|----------------------|-------------------------------------------|----------------------------------------------------|------------------------------------------|--------------------|
| Unary                | 17                                        | 10                                                 | 2                                        | 8                  |
| Binary               | 600                                       | 588                                                | 118                                      | 470                |
| Ternary              | 1006                                      | 1002                                               | 196                                      | 806                |
| Quaternary           | 179                                       | 181                                                | 39                                       | 142                |
| Quinary              | 3                                         | 3                                                  | 1                                        | 2                  |
| <b>Total</b>         | <b>1805</b>                               | <b>1784</b>                                        | <b>356</b>                               | <b>1428</b>        |

### **Part S2. Attribute ranking and reduction**

The total number of attributes generated for training is 364. The initial Random Forest-based model and grid search for parameters were done with maximum number of attributes. Feature importance ranking is available as part of sklearn package implementation of Random Forest algorithm. Features were sorted according to their importance for the model. Reduced list of ranked attributes from previous model was used for construction of Random Forest model at the next step of optimization. 10-fold cross-validation was used at each step of model optimization. Performance of each model was estimated with different statistical measures (Table S2). Taking into account all statistical estimates one could conclude that the optimum predictive performance is achieved with the regression model built using 50 attributes.

**Table S3.** The 10-fold cross-validated models with varying number of attributes using Random Forest algorithm. Performance of models was estimated with metrics including correlation

coefficient (R), coefficient of determination ( $R^2$ ), mean absolute error (MAE), root mean squared error (RMSE), relative absolute error (RAE), and relative squared error (RSE)

| <b># of attributes</b> | <b>R</b> | <b>R<sup>2</sup></b> | <b>MAE</b> | <b>RMSE</b> | <b>RAE,%</b> | <b>RSE,%</b> |
|------------------------|----------|----------------------|------------|-------------|--------------|--------------|
| 364                    | 0.91     | 0.84                 | 13.58      | 22.7        | 30.19        | 16.41        |
| 200                    | 0.92     | 0.84                 | 13.56      | 22.65       | 30.14        | 16.33        |
| 100                    | 0.92     | 0.84                 | 13.57      | 22.45       | 29.98        | 15.93        |
| 50                     | 0.92     | 0.84                 | 13.58      | 22.35       | 29.99        | 15.79        |
| 40                     | 0.92     | 0.84                 | 13.74      | 22.47       | 30.34        | 15.97        |
| 30                     | 0.92     | 0.84                 | 13.88      | 22.53       | 30.66        | 16.05        |
| 20                     | 0.91     | 0.84                 | 14.23      | 22.88       | 31.43        | 16.55        |
| 10                     | 0.89     | 0.80                 | 15.89      | 25.42       | 35.09        | 20.43        |

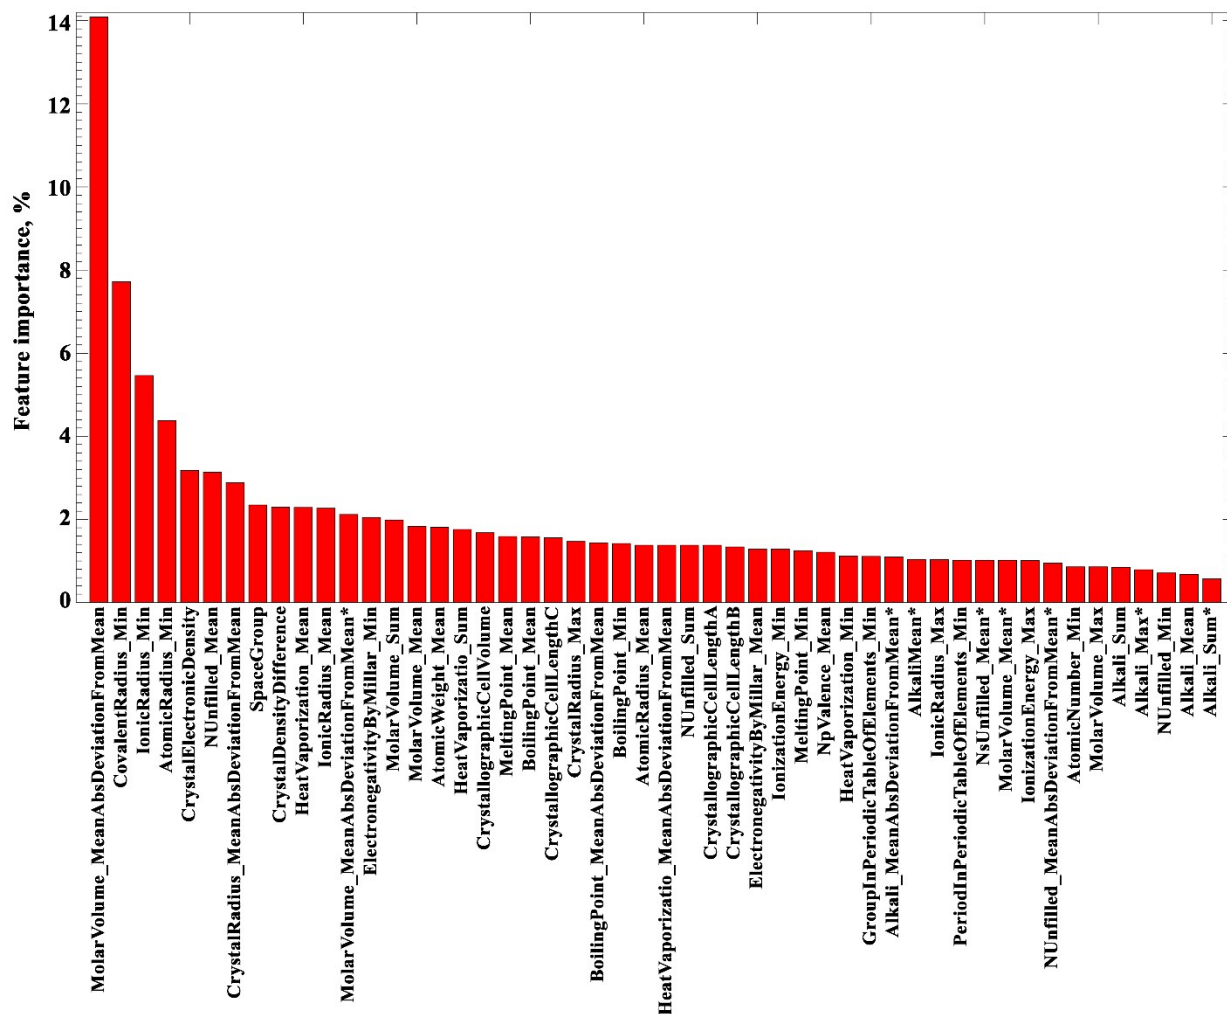

**Figure S4.** Attribute importance ranking in the Random Forest model. The attribute labels could be seen in Table S3.

**Table S4.** The list of attributes and their descriptions for the final Random Forest model discussed in this work.

| Attribute importance, % | Attribute label                        | Attribute type based on           |
|-------------------------|----------------------------------------|-----------------------------------|
| 14.09                   | MolarVolume_MeanAbsDeviationFromMean   | properties of atoms               |
| 7.72                    | CovalentRadius_Min                     | properties of atoms               |
| 5.46                    | IonicRadius_Min                        | properties of atoms               |
| 4.38                    | AtomicRadius_Min                       | properties of atoms               |
| 3.18                    | CrystalElectronicDensity               | property of crystallographic cell |
| 3.14                    | NUnfilled_Mean                         | properties of atoms               |
| 2.89                    | CrystalRadius_MeanAbsDeviationFromMean | properties of atoms               |
| 2.35                    | SpaceGroup                             | property of crystallographic cell |
| 2.30                    | CrystalDensityDifference               | property of crystallographic cell |

|      |                                           |                                          |
|------|-------------------------------------------|------------------------------------------|
| 2.29 | HeatVaporization_Mean                     | properties of atoms                      |
| 2.27 | IonicRadius_Mean                          | properties of atoms                      |
| 2.12 | MolarVolume_MeanAbsDeviationFromMean*     | coefficient weighted properties of atoms |
| 2.05 | ElectronegativityByMillar_Min             | properties of atoms                      |
| 1.99 | MolarVolume_Sum                           | properties of atoms                      |
| 1.83 | MolarVolume_Mean                          | properties of atoms                      |
| 1.81 | Atomic_weightMean                         | properties of atoms                      |
| 1.76 | HeatVaporization_Sum                      | properties of atoms                      |
| 1.68 | CrystallographicCellVolume                | property of crystallographic cell        |
| 1.59 | MeltingPoint_Mean                         | properties of atoms                      |
| 1.58 | BoilingPoint_Mean                         | properties of atoms                      |
| 1.56 | CrystallographicCellLengthC               | properties of atoms                      |
| 1.47 | CrystalRadius_Max                         | properties of atoms                      |
| 1.44 | BoilingPoint_MeanAbsDeviationFromMean     | properties of atoms                      |
| 1.42 | BoilingPoint_Min                          | properties of atoms                      |
| 1.38 | AtomicRadius_Mean                         | properties of atoms                      |
| 1.38 | HeatVaporization_MeanAbsDeviationFromMean | properties of atoms                      |
| 1.38 | Nunfilled_Sum                             | properties of atoms                      |
| 1.38 | CrystallographicCellLengthA               | properties of atoms                      |
| 1.34 | CrystallographicCellLengthB               | properties of atoms                      |
| 1.29 | ElectronegativityByMillar_Mean            | properties of atoms                      |
| 1.29 | IonizationEnergy_Min                      | properties of atoms                      |
| 1.25 | MeltingPoint_Min                          | properties of atoms                      |
| 1.21 | NpValence_Mean                            | properties of atoms                      |
| 1.12 | HeatVaporizatio_Min                       | properties of atoms                      |
| 1.11 | GroupInPeriodicTableOfElements_Min        | properties of atoms                      |
| 1.10 | AlkaliMeanAbsDeviationFrom_Mean*          | coefficient weighted properties of atoms |
| 1.04 | Alkali_Mean*                              | coefficient weighted properties of atoms |
| 1.03 | IonicRadius_Max                           | properties of atoms                      |
| 1.02 | PeriodInPeriodicTableOfElements_Min       | properties of atoms                      |
| 1.02 | NsUnfilled_Mean*                          | coefficient weighted properties of atoms |
| 1.02 | MolarVolume_Mean*                         | coefficient weighted properties of atoms |
| 1.01 | IonizationEnergy_Max                      | properties of atoms                      |
| 0.95 | Nunfilled_MeanAbsDeviationFromMean*       | coefficient weighted properties of atoms |
| 0.86 | AtomicNumber_Min                          | properties of atoms                      |
| 0.86 | MolarVolume_Max                           | properties of atoms                      |
| 0.85 | Alkali_Sum                                | properties of atoms                      |
| 0.79 | Alkali_Max*                               | coefficient weighted properties of atoms |
| 0.71 | Nunfilled_Min                             | properties of atoms                      |
| 0.68 | Alkali_Mean                               | properties of atoms                      |
| 0.57 | Alkali_Sum*                               | coefficient weighted properties of atoms |

### Part S3. Experimental and predicted values of Bulk modulus

**Table S5.** Predicted vs experimentally measured values of Bulk modulus, structural and composition details of materials.

| ICSD#                                                                                                                            | Formula                                             | SG               | TN  | Bulk <sub>Predicted</sub> | Formula<br>(if different from<br>ICSD)                | Bulk <sub>Exp</sub> | SG<br>(if reported)       |
|----------------------------------------------------------------------------------------------------------------------------------|-----------------------------------------------------|------------------|-----|---------------------------|-------------------------------------------------------|---------------------|---------------------------|
| 58289                                                                                                                            | Ag <sub>0.5</sub> In <sub>0.5</sub> La <sub>1</sub> | Pm-3m            | 221 | 67.2316                   | Ag <sub>0.89</sub> In <sub>0.02</sub> La <sub>1</sub> | 43.9 <sup>1</sup>   | Pm-3m                     |
| 58289, 173984,<br>174087, 174088,<br>174089, 174090,<br>174091, 174092,<br>246904, 247821,<br>281041;<br>31058, 35540,<br>605623 | Ag <sub>2</sub> O <sub>1</sub>                      | Pn-3mZ<br>Pn-3mS | 224 | 126.86±0.26               |                                                       | 84 <sup>2</sup>     | Pn-3m                     |
| 70055                                                                                                                            | Ag <sub>6</sub> Ge <sub>10</sub> P <sub>12</sub>    | I-43m            | 217 | 56.22                     |                                                       | 71.4 <sup>1</sup>   | I-43m                     |
| 35331                                                                                                                            | AlIB <sub>12</sub>                                  | P41212           | 92  | 122.68                    |                                                       | 139 <sup>3</sup>    | monophase with impurities |
| 159334, 43851,<br>52282, 606058,<br>654653                                                                                       | AlIB <sub>2</sub>                                   | P6/mmm           | 191 | 151.55±0.05               |                                                       | 170 <sup>4</sup>    |                           |
| 187973, 57596,<br>606532, 606533,<br>606535, 657493                                                                              | AlICo <sub>1</sub>                                  | Pm-3m            | 221 | 115.22±1.62               |                                                       | 162 <sup>5</sup>    | PM-3m                     |
| 151203, 159135,<br>185281, 57695,<br>607008, 607009,<br>607010, 607011,<br>607012, 607014,<br>607016, 607017                     | AlICu <sub>2</sub> Mn <sub>1</sub>                  | Fm-3m            | 225 | 73.97±0.38                |                                                       | 109 <sup>1</sup>    |                           |
| 106247, 58155,<br>609224, 609238                                                                                                 | AlIRu <sub>1</sub>                                  | Pm-3m            | 221 | 136.89±2.15               |                                                       | 207 <sup>6</sup>    | multiphase                |
| 24804, 151218,<br>190410, 44325,<br>44978, 52651,<br>58160, 609287,<br>609288, 609290                                            | AlISb <sub>1</sub>                                  | F-43m            | 216 | 48.46±0.13                |                                                       | 59 <sup>7</sup>     | F-43m                     |
| 43359, 43424,<br>610534, 43950,<br>43951                                                                                         | AsIGa <sub>1</sub>                                  | F-43m            | 216 | 59.30                     |                                                       | 75 <sup>8</sup>     | F-43m                     |
| 150571, 58437,<br>611778                                                                                                         | Au <sub>1</sub> Cu <sub>1</sub> Zn <sub>2</sub>     | Fm-3m            | 225 | 72.15                     |                                                       | 132 <sup>1</sup>    |                           |
| 108027, 20384                                                                                                                    | B <sub>1</sub> Be <sub>2</sub>                      | Fm-3m            | 225 | 137.92                    |                                                       | 124 <sup>3</sup>    | monophase with impurities |
| 25535                                                                                                                            | B <sub>1</sub> Be <sub>4</sub>                      | P4/nmmS          | 129 | 136.96                    |                                                       | 123 <sup>3</sup>    | monophase with impurities |

|                                             |         |        |            |             |  |                                                                                                                                                            |                                                                                                                                                     |
|---------------------------------------------|---------|--------|------------|-------------|--|------------------------------------------------------------------------------------------------------------------------------------------------------------|-----------------------------------------------------------------------------------------------------------------------------------------------------|
| 150598, 236951,<br>92832, 93925             | B2MgI   | P6/mmm | 191        | 129.143     |  | 145 <sup>9</sup> ,<br>120 <sup>10</sup> ,<br>151 <sup>11</sup>                                                                                             | polycrystalline aggregate,<br>P6/mmm;<br>P6/mmm                                                                                                     |
| 24701;<br>237013, 615593,<br>615594, 659126 | BTiI    | Pnma   | 62,<br>191 | 154.11±2.26 |  | 255 <sup>12</sup> ,<br>240 <sup>13</sup> ,<br>251 <sup>3</sup> ,<br>276 <sup>14</sup> ,<br>237 <sup>15</sup> ,<br>346 <sup>15</sup> ,<br>323 <sup>15</sup> | NA,<br>(polycrystalline aggregate),<br>monophase with impurities,<br>two-phase ceramics,<br>TiB2 98.89, the rest is impurities,<br>NA,<br>NA,<br>NA |
| 30327, 44492,<br>615766, 615771             | B2ZrI   | P6/mmm | 191        | 144.24      |  | 218 <sup>16</sup>                                                                                                                                          | P6/mmm                                                                                                                                              |
| 58745                                       | Be12TiI | P6/mmm | 191        | 113.09      |  | 134 <sup>3</sup>                                                                                                                                           | monophase with impurities                                                                                                                           |
| 58758, 616516                               | Be13ZrI | Fm-3c  | 226        | 128.33      |  | 122 <sup>3</sup>                                                                                                                                           | Bi-phase                                                                                                                                            |
| 183373, 186889,<br>44724, 616412,<br>616413 | Be1SI   | F-43m  | 216        | 89.19±0.56  |  | 105 <sup>17</sup>                                                                                                                                          | F-43m                                                                                                                                               |
| 183374, 192056,<br>53944, 616419            | Be1SeI  | F-43m  | 216        | 84.43±0.07  |  | 92 <sup>17</sup>                                                                                                                                           | F-43m                                                                                                                                               |
| 183375, 290008,<br>53945, 616439            | Be1TeI  | F-43m  | 216        | 56.88±0.12  |  | 67 <sup>17</sup>                                                                                                                                           | F-43m                                                                                                                                               |
| 22174, 236387,<br>44290, 53834,<br>53848    | Br1CsI  | Pm-3m  | 221        | 27.01±0.06  |  | 15.4 <sup>18</sup>                                                                                                                                         | F-43m                                                                                                                                               |



|                                                                                                                                                                                                                   |               |                                                              |                          |             |                |                                        |                                        |
|-------------------------------------------------------------------------------------------------------------------------------------------------------------------------------------------------------------------|---------------|--------------------------------------------------------------|--------------------------|-------------|----------------|----------------------------------------|----------------------------------------|
| 27982, 44274,<br>52236, 53819                                                                                                                                                                                     | BrLi1         | Fm-3m                                                        | 225                      | 30±0.02     |                | 26 <sup>18</sup>                       | F-43m                                  |
| 41549, 75816,<br>79574, 83231,<br>89142                                                                                                                                                                           | C1B2Ni2Y1     | I4/mmm                                                       | 139                      | 124.51      |                | 200 <sup>19</sup>                      | polycrystalline thin slabs             |
| 15325, 164970,<br>164971, 164972,<br>24169, 27051,<br>618777, 159380,<br>161172, 18136,<br>23887, 24168,<br>27475, 28187,<br>28310, 28341,<br>28895, 164973,<br>164974, 164975,<br>618779, 38150,<br>27635, 28360 | C1Si1         | P63mc<br>R3mH<br>F-43m<br>P3m1                               | 186<br>160<br>216<br>156 | 169.46±9.52 |                | 184 <sup>3</sup> ,<br>211 <sup>7</sup> | Polycrystalline (?) with<br>impurities |
| 181020, 181244,<br>28730, 29008,<br>40938, 41413,<br>44618, 44937,<br>52754, 53978,<br>60368, 60369,<br>60370, 60371,<br>60559, 655133,<br>656448, 76045,<br>82707                                                | Ca1F2         | Fm-3m                                                        | 225                      | 80.58±6.01  |                | 84 <sup>20</sup>                       | Fm-3m                                  |
| 183368                                                                                                                                                                                                            | Cd0.5Mn0.5Te1 | F-43m                                                        | 216                      | 42.139±0.90 | Cd0.55Mn0.45Te | 40.3 <sup>1</sup>                      |                                        |
| 40413                                                                                                                                                                                                             | Cd0.4Mn0.6Te1 | Fm-3m                                                        | 225                      | 42.74       |                | 42.3 <sup>1</sup>                      |                                        |
| 102073, 620528,<br>620546;<br>108237;<br>246692, 246693;<br>620524, 620526,<br>620544;<br>620527, 620531,<br>620533, 93942,<br>93943, 93944,<br>93945;<br>620534;<br>67862, 67863,<br>67864                       | Cd1Se1        | I41/amdS<br>Pmm2<br>Cmcm<br>Fm-3m<br>F-43m<br>P63mc<br>P3121 | 186                      | 44.01±0.24  |                | 53 <sup>8</sup>                        |                                        |
| 67862, 67863,<br>67864;<br>93942, 93943,<br>93944, 93945                                                                                                                                                          | Cd1Te1        | P3121<br>F-43m                                               | 141                      | 37.15       |                | 42 <sup>8</sup>                        |                                        |
| 22173, 44289,<br>53847, 622366,<br>622367, 655032                                                                                                                                                                 | Cl1Cs1        | Pm-3m                                                        | 221                      | 35.87±0.10  |                | 17.6 <sup>18</sup>                     |                                        |
| 26909, 27981,<br>44273, 52235,                                                                                                                                                                                    | Cl1Li1        | Fm-3m                                                        | 225                      | 42.38±0.24  |                | 32.9 <sup>18</sup>                     |                                        |

|                                                                                                                                                                                                                                                                                     |                 |                  |     |             |  |                                                                                        |        |
|-------------------------------------------------------------------------------------------------------------------------------------------------------------------------------------------------------------------------------------------------------------------------------------|-----------------|------------------|-----|-------------|--|----------------------------------------------------------------------------------------|--------|
| 53818                                                                                                                                                                                                                                                                               |                 |                  |     |             |  |                                                                                        |        |
| 61563                                                                                                                                                                                                                                                                               | Cs1F1           | Pm-3m            | 221 | 41.64       |  | 19.3 <sup>18</sup>                                                                     |        |
| 44291, 44938,<br>53835, 53849,<br>56522, 56523,<br>56524, 60498                                                                                                                                                                                                                     | Cs1I1           | Pm-3m            | 221 | 23.79±2.53  |  | 12.5 <sup>18</sup>                                                                     |        |
| 103056, 628351                                                                                                                                                                                                                                                                      | Cu1Mg1Zn1       | Fd-3mS           | 227 | 57.11±0.01  |  | 58 <sup>1</sup>                                                                        |        |
| 108422                                                                                                                                                                                                                                                                              | Dy0.73Fe2Tb0.27 | Fd-3mS           | 227 | 76.68       |  | 113 <sup>1</sup>                                                                       |        |
| 160213                                                                                                                                                                                                                                                                              | Dy2O3           | P-3m1            | 164 | 111.68      |  | 231 <sup>21</sup>                                                                      |        |
| 180837, 184538,<br>185242, 185606,<br>248578, 248579,<br>41269, 61269,<br>630042, 630047,<br>66736, 82421,<br>96208                                                                                                                                                                 | Dy2O3           | Ia-3             | 206 | 112.02±0.06 |  | 150 <sup>22</sup> ,<br>191 <sup>21</sup>                                               |        |
| 180843, 184540,<br>186592, 27774,<br>39186, 39187,<br>39188, 39189,<br>39190, 39521,<br>53406, 55832,<br>630890, 630897,<br>94888, 96210                                                                                                                                            | Er2O3           | Ia-3             | 206 | 117.03±0.36 |  | 155 <sup>23</sup> ,<br>140 <sup>22</sup> ,<br>200 <sup>24</sup> ,<br>136 <sup>25</sup> |        |
| 194513                                                                                                                                                                                                                                                                              | Eu2O3           | P-3m1            | 164 | 92.21       |  | 134 <sup>25</sup>                                                                      | P-3m1  |
| 40472, 631460,<br>631468, 659185,<br>96953                                                                                                                                                                                                                                          | Eu2O3           | Ia-3             | 206 | 90.36±4.13  |  | 115 <sup>25</sup>                                                                      | Ia-3   |
| 53828                                                                                                                                                                                                                                                                               | F1Rb1           | Fm-3m            | 225 | 27.97       |  | 24.1 <sup>18</sup>                                                                     | Fm-3m  |
| 53828, 168800,<br>181245, 248431,<br>248432, 260881,<br>262348, 40414,<br>41402                                                                                                                                                                                                     | F2Sr1           | Fm-3m            | 225 | 64.79±0.28  |  | 71.3 <sup>20</sup>                                                                     | Fm-3m  |
| 158504, 158505,<br>158506, 158740,<br>158741, 158742,<br>158743, 158744,<br>158745, 158746,<br>165105, 174321,<br>183969, 183970,<br>26410, 30860,<br>49549, 50567,<br>64829, 65339,<br>65340, 65341,<br>75627, 77588,<br>77589, 77590,<br>77591, 77592,<br>84098, 84611,<br>85177; | Fe3O4           | Fd-3mZ<br>Fd-3mS | 227 | 169.52±0.86 |  | 187 <sup>26</sup>                                                                      | Fd-3mZ |

|                                                                                                                                                                                                                                              |               |                                                                                           |                                                                 |             |                 |                                                                                                               |       |
|----------------------------------------------------------------------------------------------------------------------------------------------------------------------------------------------------------------------------------------------|---------------|-------------------------------------------------------------------------------------------|-----------------------------------------------------------------|-------------|-----------------|---------------------------------------------------------------------------------------------------------------|-------|
| 85806, 85807,<br>96012, 98085,<br>98087                                                                                                                                                                                                      |               |                                                                                           |                                                                 |             |                 |                                                                                                               |       |
| 103795, 635033,<br>635040                                                                                                                                                                                                                    | GalP1         | F-43m                                                                                     | 216                                                             | 66.22       |                 | 89 <sup>8</sup>                                                                                               |       |
| 44843, 635317                                                                                                                                                                                                                                | GalSb1        | F-43m                                                                                     | 215                                                             | 40.65       |                 | 57 <sup>8</sup>                                                                                               |       |
| 160211, 162247                                                                                                                                                                                                                               | Gd2O3         | P-3m1                                                                                     | 164                                                             | 125.64±0.03 |                 | 142 <sup>27</sup> ,<br>160 <sup>28</sup> ,<br>174 <sup>29</sup> ,<br>145 <sup>25</sup>                        | P-3m1 |
| 150677, 152449,<br>160886, 165505,<br>181377, 183132,<br>184536, 184590,<br>184591, 184592,<br>184593, 184594,<br>184595, 193365,<br>40473, 41270,<br>636104, 636111,<br>636112, 94892,<br>96207                                             | Gd2O3         | Ia-3                                                                                      | 206                                                             | 131.56±0.12 |                 | 118 <sup>27</sup> ,<br>188 <sup>28</sup> ,<br>134 <sup>29</sup> ,<br>125 <sup>25</sup>                        | Ia-3  |
| 167204, 189805;<br>636533;<br>16954, 173528;<br>173890;<br>189803, 189804,<br>248478, 248479,<br>94305, 94306;<br>245956, 245958,<br>245959, 245960,<br>245961;<br>246628;<br>53643;<br>636526;<br>636527, 636528,<br>43422, 53788,<br>53642 | Ge1           | P63/mmc<br>P63mc<br>P43212<br>Ia-3<br>Cmca<br>R-3H<br>Imma<br>I41/amdS<br>Fm-3m<br>Fd-3mS | 194<br>186<br>96<br>206<br>64<br>148<br>74<br>141<br>225<br>227 | 64.68±5.26  |                 | 4.06 <sup>8</sup> ,<br>78 <sup>7</sup>                                                                        |       |
| 56204                                                                                                                                                                                                                                        | Hg0.7Mn0.3Te1 | F-43m                                                                                     | 216                                                             | 37.19       | Hg0.8 Mn0.2 Te1 | 40.8 <sup>1</sup>                                                                                             | F-43m |
| 168445                                                                                                                                                                                                                                       | Hg5In2Te8     | F-43m                                                                                     | 216                                                             | 36.09       |                 | 33.6 <sup>1</sup>                                                                                             | F-43m |
| 160214                                                                                                                                                                                                                                       | Ho2O3         | P-3m1                                                                                     | 164                                                             | 116.84      |                 | 204 <sup>30</sup>                                                                                             | P-3m1 |
| 152458, 184539,<br>185248, 27773,<br>41268, 44516,<br>639519, 639523,<br>639525, 80038,<br>82422, 96209                                                                                                                                      | Ho2O3         | Ia-3                                                                                      | 206                                                             | 116.57±0.94 |                 | 206 <sup>30</sup> ,<br>127 <sup>23</sup> ,<br>134 <sup>22</sup> ,<br>178 <sup>27</sup> ,<br>178 <sup>31</sup> | Ia-3  |
| 27983, 414244,<br>44275, 53820                                                                                                                                                                                                               | IlLi1         | Fm-3m                                                                                     | 225                                                             | 27.98±0.09  |                 | 19.3 <sup>18</sup>                                                                                            | Fm-3m |
| 10021, 108558,                                                                                                                                                                                                                               | In1Sb1        | Pmm2                                                                                      | 25                                                              | 37.80±3.17  |                 | 47 <sup>8</sup>                                                                                               |       |

|                                                                                                                                         |       |                                                      |     |             |  |                                                                   |       |
|-----------------------------------------------------------------------------------------------------------------------------------------|-------|------------------------------------------------------|-----|-------------|--|-------------------------------------------------------------------|-------|
| 57396, 655298,<br>659843;<br>10022;<br>44641;<br>108559, 659364;<br>157947;<br>44331, 640427,<br>640431;<br>640432                      |       | PmnnS<br>Pm-3m<br>I41/amdS<br>Cmcm<br>F-43m<br>P63mc |     |             |  |                                                                   |       |
| 100205, 151763,<br>154586, 160205,<br>184524, 192270,<br>24693, 56771,<br>641599, 641603,<br>96196                                      | La2O3 | P-3m1                                                | 164 | 99.13±4.16  |  | 113 <sup>25</sup> ,<br>135.6 <sup>32</sup>                        | P-3m1 |
| 173180, 173193,<br>173206, 180569,<br>182024, 182025,<br>182026, 182027,<br>182028, 22402,<br>54368, 57411,<br>60431, 642216,<br>642219 | Li2O1 | Fm-3m                                                | 225 | 67.15       |  | 88 <sup>33</sup>                                                  | Fm-3m |
| 151762, 168341,<br>193361, 194467,<br>40471, 428543,<br>642475, 642477,<br>96211                                                        | Lu2O3 | Ia-3                                                 | 206 | 144.91±0.29 |  | 144 <sup>25</sup> ,<br>214 <sup>34</sup> ,<br>113.5               | Ia-3  |
| 187171, 28903,<br>30241, 41234,<br>44930, 53939,<br>603166, 642784,<br>642786, 642787,<br>659124                                        | Mg1S1 | Fm-3m                                                | 225 | 67.51±0.25  |  | 80 <sup>35</sup>                                                  | Fm-3m |
| 160208, 169442,<br>184526, 191536,<br>28180, 32514,<br>645656, 645658,<br>645659, 645663,<br>96199                                      | Nd2O3 | P-3m1                                                | 164 | 107.84±0.20 |  | 135.6 <sup>32</sup>                                               | P-3m1 |
| 60210, 647455,<br>77685                                                                                                                 | O3Sm2 | P-3m1                                                | 164 | 88.24±0.49  |  | 224 <sup>36</sup> ,<br>130 <sup>25</sup> ,<br>155 <sup>37</sup>   | P-3m1 |
| 165779, 184535,<br>40475, 647450,<br>96206                                                                                              | O3Sm2 | Ia-3                                                 | 206 | 95.99±0.20  |  | 142 <sup>36</sup> ,<br>116 <sup>25</sup> ,<br>149 <sup>37</sup>   | Ia-3  |
| 184541, 61270,<br>647578, 647581,<br>78582, 90669                                                                                       | O3Tm2 | Ia-3                                                 | 206 | 94.63±0.29  |  | 143 <sup>38</sup> ,<br>130 <sup>22</sup> ,<br>154.5 <sup>31</sup> | Ia-3  |
| 152465, 163730,<br>165770, 191322,                                                                                                      | O3Yb2 | Ia-3                                                 | 206 | 59.66±0.10  |  | 181 <sup>39</sup>                                                 | Ia-3  |

|                                                                                                                                                                                                                                                                                                                                                                                                                                                                                                                                                                                                                                                     |                                                       |                                         |                                 |            |  |                    |  |
|-----------------------------------------------------------------------------------------------------------------------------------------------------------------------------------------------------------------------------------------------------------------------------------------------------------------------------------------------------------------------------------------------------------------------------------------------------------------------------------------------------------------------------------------------------------------------------------------------------------------------------------------------------|-------------------------------------------------------|-----------------------------------------|---------------------------------|------------|--|--------------------|--|
| 202904, 27775,<br>39179, 39180,<br>39181, 39182,<br>39183, 39184,<br>41266, 420428,<br>62871, 62872,<br>62873, 62874,<br>647660, 647662,<br>647665, 78583,<br>84138, 96959                                                                                                                                                                                                                                                                                                                                                                                                                                                                          |                                                       |                                         |                                 |            |  |                    |  |
| 156404                                                                                                                                                                                                                                                                                                                                                                                                                                                                                                                                                                                                                                              | Pb <sub>0.71</sub> Sn <sub>0.29</sub> Te <sub>1</sub> | Pnma                                    | 62                              | 33.53      |  | 36.3 <sup>1</sup>  |  |
| 250762, 53932,<br>648434, 648437,<br>648443, 648450                                                                                                                                                                                                                                                                                                                                                                                                                                                                                                                                                                                                 | Pb <sub>1</sub> Si                                    | Fm-3m                                   | 225                             | 49.74±0.01 |  | 52.9 <sup>40</sup> |  |
| 15736, 15737,<br>15738, 15739,<br>15740, 15741,<br>15742, 15743,<br>15744, 291065,<br>291066, 37393,<br>37394, 37395,<br>37396, 37397,<br>37398, 37399,<br>37400, 42178,<br>42179, 42180,<br>42181, 42182,<br>42183, 42184,<br>42185, 42186,<br>42187, 42188,<br>42189, 42190,<br>42191, 42192,<br>42193, 42194,<br>42195, 42196,<br>42779, 42780,<br>42781, 42782,<br>42783, 42784,<br>42785, 42786,<br>42787, 42788,<br>42789, 42790,<br>42791, 42792,<br>42793, 42794,<br>42795, 42796,<br>42797, 42798,<br>42799, 42800,<br>42801, 42802,<br>42803, 42804,<br>42805, 42806,<br>42807, 42808,<br>42809, 42810,<br>42811, 42812,<br>42813, 42814, | SiZn <sub>1</sub>                                     | P63mc<br>R3mH<br>P3m1<br>F-43m<br>P63mc | 186<br>160<br>156<br>216<br>186 | 54.34±3.37 |  | 77 <sup>8</sup>    |  |

|                                                                                                                                                                                                                                                                                                                                                                                                                                                                                  |        |                                                                 |                                                     |            |  |                  |
|----------------------------------------------------------------------------------------------------------------------------------------------------------------------------------------------------------------------------------------------------------------------------------------------------------------------------------------------------------------------------------------------------------------------------------------------------------------------------------|--------|-----------------------------------------------------------------|-----------------------------------------------------|------------|--|------------------|
| 42815, 42816,<br>42817, 42818,<br>42819, 42820,<br>42821, 42822,<br>42823, 42824,<br>42825, 42829,<br>42830, 42831,<br>42832, 42833,<br>42834, 42835,<br>42836, 42837,<br>42838, 42839,<br>42840, 42841,<br>42842, 42843,<br>42844, 42845,<br>42846, 42847,<br>42848, 42849,<br>42850, 42851,<br>42852, 42853,<br>42854, 42989,<br>42990, 42991,<br>42992, 42993,<br>42994, 42995,<br>42996, 42997,<br>43068, 43069,<br>43070, 43071,<br>43072, 43073,<br>52223, 67790,<br>76954 |        |                                                                 |                                                     |            |  |                  |
| 181761<br><br>53952                                                                                                                                                                                                                                                                                                                                                                                                                                                              | Se1Zn1 | F-43m                                                           | 216                                                 | 49.50±0.05 |  | 62 <sup>8</sup>  |
| 109025, 16955,<br>246372, 30101,<br>41991, 43403,<br>43610, 51688,<br>52266, 52458,<br>52459, 57187,<br>652255, 652258,<br>659044, 89414,<br>89415, 89416                                                                                                                                                                                                                                                                                                                        | Si1    | I41/amdS<br>Ia-3<br>P63mc<br>Fd-3mS<br>Fm-3m<br>P63/mmc<br>Cmca | 141<br>206<br>186<br>206<br>227<br>225<br>194<br>64 | 90.59±4.73 |  | 100 <sup>7</sup> |
| 184481, 184482,<br>184483, 184484,<br>184485, 184486,<br>184487, 184488,<br>184489, 184490,<br>184491, 184492,<br>184493, 184494,<br>184495, 184496,<br>184497, 78310,<br>80076                                                                                                                                                                                                                                                                                                  | Te1Zn1 | F-43m<br>P3121<br>Cmcm<br>Fm-3m<br>P31                          | 216<br>152<br>63<br>225<br>144                      | 43.42±1.00 |  | 51 <sup>8</sup>  |



## Part S4. ThermoEl tool for prediction of Bulk modulus

The Bulk modulus prediction component is an extension of our ThermoEl toolkit (Fig. S4). In order to obtain prediction one shall upload the cif-file of material. References are given on the web for appropriate literature sources. An example of cif-file content on experimentally studied  $\text{Cd}_{0.4}\text{Mn}_{0.6}\text{Te}$  could be also viewed by exploring window on the right side of the page.

### ThermoEl toolkit

HomeSeebeck coefficientBulk modulus

**Welcome to Bulk modulus component of our toolkit**

It is developed based on 2500 data points as they reported in "TE design lab" database <http://www.tedesignlab.org/>. In order to obtain predictions, various properties of atoms as well as some details of crystal structures were fed into Random Forest regression model.

**Obtaining prediction is easy**

Prediction for the compound under investigation is done based on information extracted from its crystallographic information (cif) file. Tool is working with cif-files as they reported on ICSD database [Hall, S. R., Allen, F. H. and Brown, I. D. (1991). "The Crystallographic Information File (CIF): A New Standard Archive File for Crystallography", *Acta Cryst.*, A47, 655-685 or [http://www.iucr.org/\\_data/assets/pdf\\_file/0019/22618/cifguide.pdf](http://www.iucr.org/_data/assets/pdf_file/0019/22618/cifguide.pdf)]

In order to get prediction of Bulk modulus (B), user should simply upload corresponding cif-file.

File:

I am currently working toward final version of the tool. Please, report bugs to [alona.furmanchuk@northwestern.edu](mailto:alona.furmanchuk@northwestern.edu).

Developed by Alona Furmanchuk  
Center for Ultra-scale Computing and Information Security (CUCIS), EECS Department, Northwestern University, Evanston, IL 60208, USA

The cif-file for compound  $\text{Cd}_{0.4}\text{Mn}_{0.6}\text{Te}$  reported to have  $B = 42.3$  GPa

```
#(C) 2015 by Fachinformationszentrum Karlsruhe. All rights reserved.
data_40413-ICSD
_database_code_ICSD 40413
_audit_creation_date 1999-06-02
_audit_update_record 2004-10-01
_chemical_name_systematic 'Cadmium manganese telluride (0.4/0.6/1)'
_chemical_formula_structural '(Cd0.4 Mn0.6) Te'
_chemical_formula_sum 'Cd0.4 Mn0.6 Te1'
_chemical_name_structure_type NaCl
_exptl_crystal_density_diffrn 5.17
_publ_section_title 'Atomic substitution in Cd(1-x)Mn(x)Te for 0.1<= x= 0.4'
loop
_citation_id
_citation_journal_full
_citation_year
_citation_journal_volume
_citation_page_first
_citation_page_last
_citation_journal_id_ASTM
primary 'Acta Crystallographica, Section C: Crystal Structure Communications'
1989 45 545 548 ACSCEE
loop
```

**Figure S5.** Screenshot of Bulk modulus predictive tool as it is implemented in ThermoEl tool kit. It is publicly available online at <http://info.eecs.northwestern.edu/ThermoEl>

### References

1. C. Li, Y. Li and P. Wu, *Intermetallics*, 2004, **12**, 103-109.
2. R. G. Greene, H. Luo, A. L. Ruoff, S. S. Trail and F. J. DiSalvo, Jr., *Phys. Rev. Lett.*, 1994, **73**, 2476–2479.
3. W. H. Gust, A. C. Holt and E. B. Royce, *J. Appl. Phys.*, 1973, **44**, 550-560.
4. I. I. Mazin and V. P. Antropov, *Physica C*, 2003, **385**, 49-65.
5. R. L. Fleischer, *J. Mater. Res.*, 1993, **8**, 49-58.
6. R. Fleischer, L. , R. D. Field and C. L. Briant, 1991, **22A**, 403-414.
7. S. Kamran, K. Chen and L. Chen, *Phys. Rev. B* 2008, **77**, 094109
8. M. L. Cohen, *Phys. Rev. B*, 1985, **32**, 7988-7991.
9. U. U. Harms, A. A. Serquis, R. B. Schwarz and V. F. Nesterenko, *J. Supercond.: Incorporating Novel Magn.*, 2003, **16**, 941-944.
10. K. Prassides, Y. Iwasa, T. Ido, D. H. Chi, K. Uchara, E. Nishibori, M. Tanaka, M. Sakata, Y. Ohishi, O. Shimomura, T. Muranaka and J. Akimitsu, *Phys. Rev. B*, 2001, **64**, 12509.
11. T. Vogt, G. Schneider, J. A. Hriljac, G. Yang and J. S. Abell, *Phys. Rev. B*, 2001, **62**, 220505.
12. C. A, *Engineered Materials Handbook*, ASM International, Metals Park, OH, 1991.
13. R. G. Munro, *J. Res. Natl Inst. Stand. Technol.*, 2000, **105**, 709-720.
14. S. P. Dodd, M. Cankurtaran, G. A. Saunders and B. James, *J. Mater. Sci.*, 2001, **36**, 3989-3996.



15. D. P. Dandekar and D. C. Benfanti, *J. Appl. Phys.*, 1993, **73**, 673-679.
16. T. I. Serebriakova, V. A. Neronov and P. D. Pashev, *High-Temperature Borides*, Metallurgy, Moscow, 1991.
17. K. Li, Z. Ding and D. Xue, *Phys. Status Solidi B* 2011, **248**, 1227–1236.
18. S. Narain, *Phys. Stat. Sol.*, 1994, **182**, 273-278.
19. S. Meenakshi, V. Vijayakumar, R. S. Rao, B. K. Godwal, S. K. Sikka, Z. Z. Hossain, R. R. Nagarajan, L. C. L.C. Gupta and R. R. Vijayaraghavan, *Physica B*, 1996, **223&224**, 93-95.
20. G. K. White, *J. Phys. C: Solid State Phys.* , 1980, **13**, 4905–4913
21. S. Jiang, J. Liu, C. Lin, L. Bai, Y. Zhang, X. Li, Y. Li, L. Tang and H. Wang, *Solid State Comm.*, 2013, **169**, 37-41.
22. Y. Makino and S. Miyake, *Alloys Compd.*, 2000, **313**, 235-241.
23. W. R. Manning and O. Hunter, , Jr., *J. Am. Ceram. Soc.*, 1969, **52**, 492-496.
24. Q. Guo, Y. Zhao, C. Jiang, W. L. Mao, Z. Wang, J. Zhang and Y. Wang, *Inorg. Chem.*, 2007, **46**, 6164-6169.
25. J. P. McClure, PhD thesis, University of Nevada, 2009.
26. D. L. Anderson and O. L. Anderson, *J. Geophys. Res.* , 1970, **75**, 3494–3500.
27. D. Lonappan, C. Shekar, N. V. Sahu, P. C. Kumarasamy, B. V. Bandyopadhyay and K. Rajagopalan, *Philos. Mag. Lett.*, 2008, **88**, 473-479
28. F. X. Zhang, M. Lang, J. W. Wang, U. Becker and R. C. Ewing, *Phys. Rev. B*, 2008, **78**, 064114.
29. L. Bai, J. Liu, X. Li, S. Jiang, W. Xiao, Y. Li, L. Tang, Y. Zhang and D. Zhang, *J. Appl. Phys.*, 2009, **106**, 073507.
30. S. Jiang, J. Liu, X. Li, L. Bai, W. Xiao, Y. Zhang, C. Lin, Y. Li and L. Tang, *J. Appl. Phys.*, 2011, **110**, 013526.
31. P. C. Sahu, D. Dayana Lonappan and S. N.V.C., *J. Phys.: Conf. Ser.*, 2012, **377**, 012015.
32. K. K. Pandey, N. Garg, A. K. Mishra and S. M. Sharma, *J. Phys. : Conf. Ser.* , 2012, **377**, 012006.
33. A. Otero-de-la-Roza and V. Luan~a, *J. Phys. Chem. A*, 2011, **115**, 12953–12961.
34. S. Jiang, J. Liu, C. Lin, L. Bai, W. Xiao, Y. Zhang, D. Zhang, X. Li, Y. Li and L. Tang, *J. Appl. Phys.*, 2010, **108**, 083541.
35. P. E. Van Camp, V. E. Van Doren and J. L. Martins, *Phys. Status Solidi B*, 1995, **190**, 193–197.
36. Q. Guo, Y. Zhao, C. Jiang, W. L. Mao and Z. Wang, *Solid State Comm.*, 2008, **145**, 250-254.
37. S. Jiang, J. Liu, C. Lin, X. Li and Y. Li, *J. Appl. Phys.*, 2013, **113**, 113502.
38. S. L. Dole, O. Hunter and F. W. Calderwood, *J. Am. Ceram. Soc.*, 1980, **63**, 136-139
39. C. Meyer, J. P. Sanchez, J. Thomasson and J. P. Itié, *Phys. Rev. B*, 1995, **51**, 12187.
40. A. Chroneos and R. V. Vovk, *J. Mater. Sci. – Mater. Electron.*, 2015, **26**, 2113-2116.
